# Supplementary material
Source: PubMed Central journal article supplement (PMC6348897)
Supplement: NIHMS1002864-supplement-Online_figures_and_tables.pdf [file NIHMS1002864-supplement-Online_figures_and_tables.pdf]

**Supplemental Information**

**Integrated Analysis of Genetic Ancestry  
and Genomic Alterations across Cancers**

**Jiao Yuan, Zhongyi Hu, Brandon A. Mahal, Sihai D. Zhao, Kevin H. Kensler, Jingjiang Pi, Xiaowen Hu, Youyou Zhang, Yueying Wang, Junjie Jiang, Chunsheng Li, Xiaomin Zhong, Kathleen T. Montone, Guoqiang Guan, Janos L. Tanyi, Yi Fan, Xiaowei Xu, Mark A. Morgan, Meixiao Long, Yuzhen Zhang, Rugang Zhang, Anil K. Sood, Timothy R. Rebbeck, Chi V. Dang, and Lin Zhang**

**A**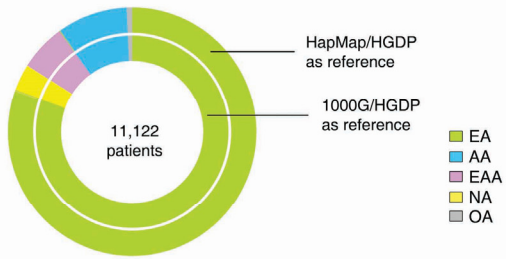**B**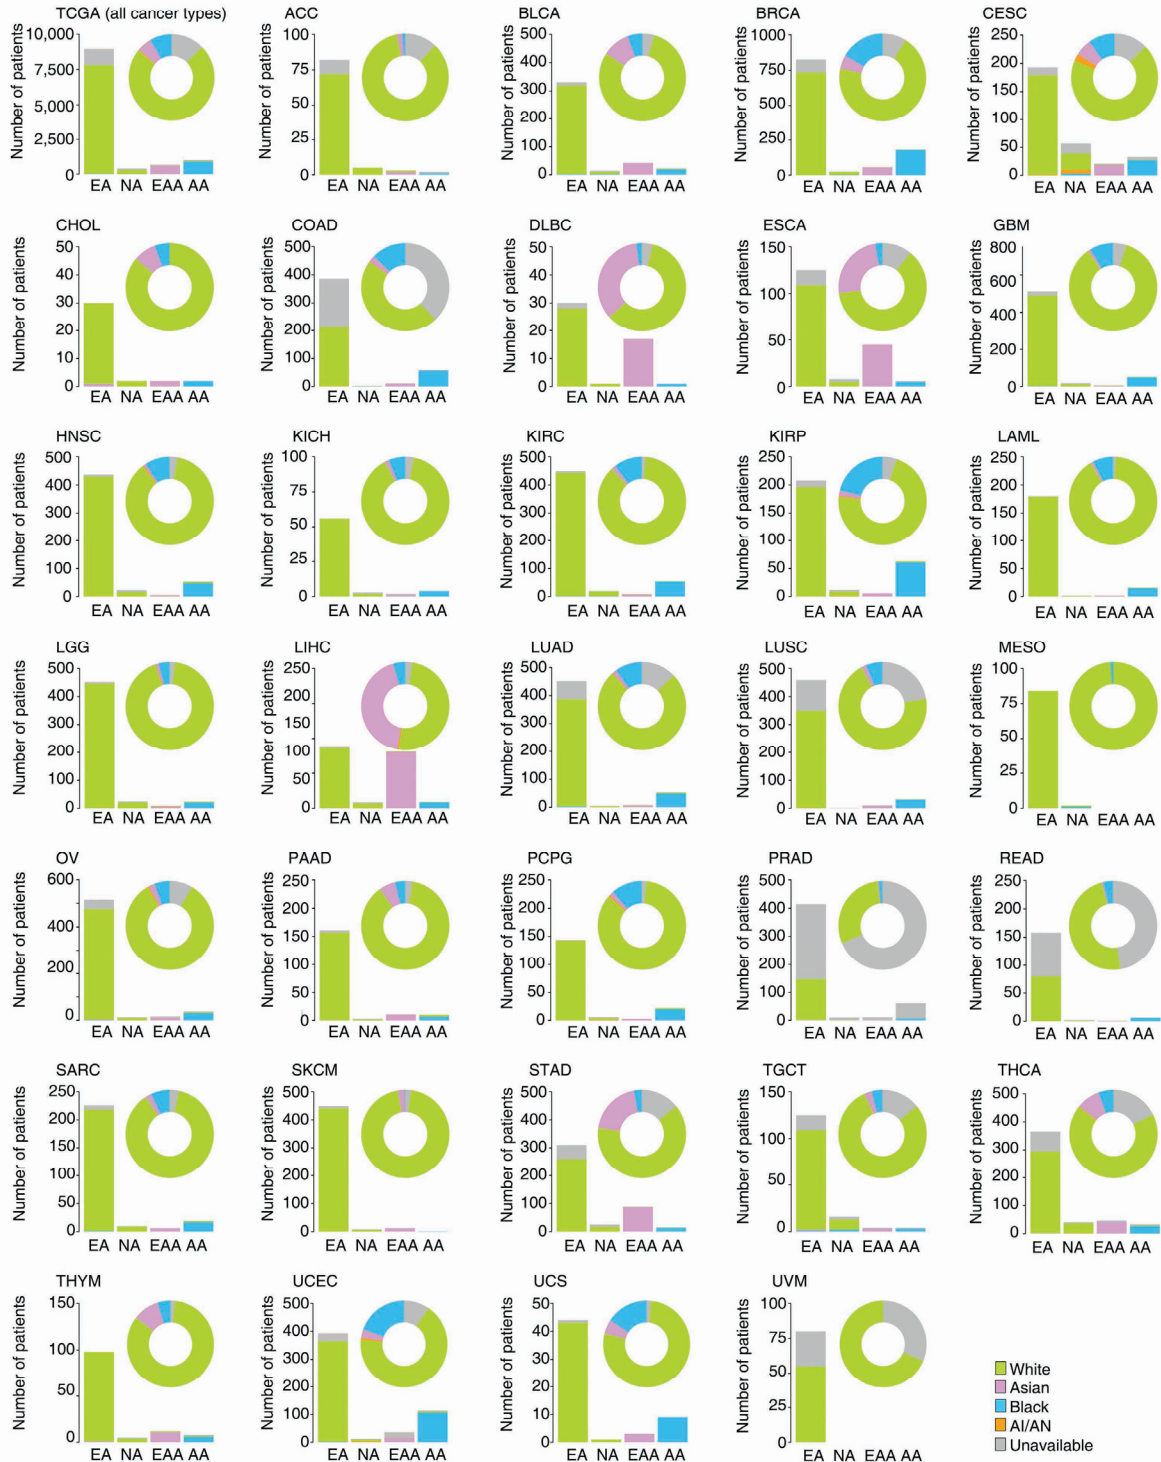

**Figure S1, related to Figure 1. Genetic ancestry of TCGA specimens inferred by EIGENSTRAT.**

**(A)** Distribution of genetic ancestry groups of the TCGA patients using different reference cohorts. The proportion of genetic ancestry groups (EA, AA, EAA, NA and OA) categorized by EIGENSTRAT is represented by a circle plot. The inner layer represents the result using the 1000 Genomes Project as reference populations. The outer layer represents the result using the HapMap Project as reference populations. For both analyses, the HGDP Project (American panel) was used as a reference for Native American. **(B)** Genetic ancestry of TCGA specimens inferred by EIGENSTRAT. Bar plots show the number of TCGA patients categorized into each of the four genetic ancestry groups (EA, NA, EAA and AA) as estimated by EIGENSTRAT across the TCGA cohort. SIRE information is color-coded by green (White), pink (Asian), blue (Black), orange (AI/AN), and grey (unavailable). The proportion of SIRE is also represented with a circle plot.

Ancestral reference ■ European ■ East Asian ■ West African ■ Native American

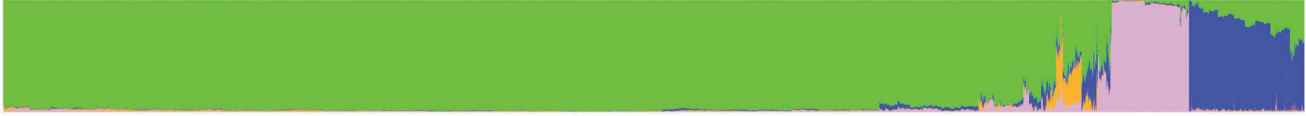

Self-identified race ■ White ■ Asian ■ Black ■ AI/AN ■ Unavailable

Self-identified ethnicity ■ Hispanic ■ non-Hispanic ■ Unavailable

Genetic ancestry ■ EA ■ EAA ■ AA ■ NA ■ OA

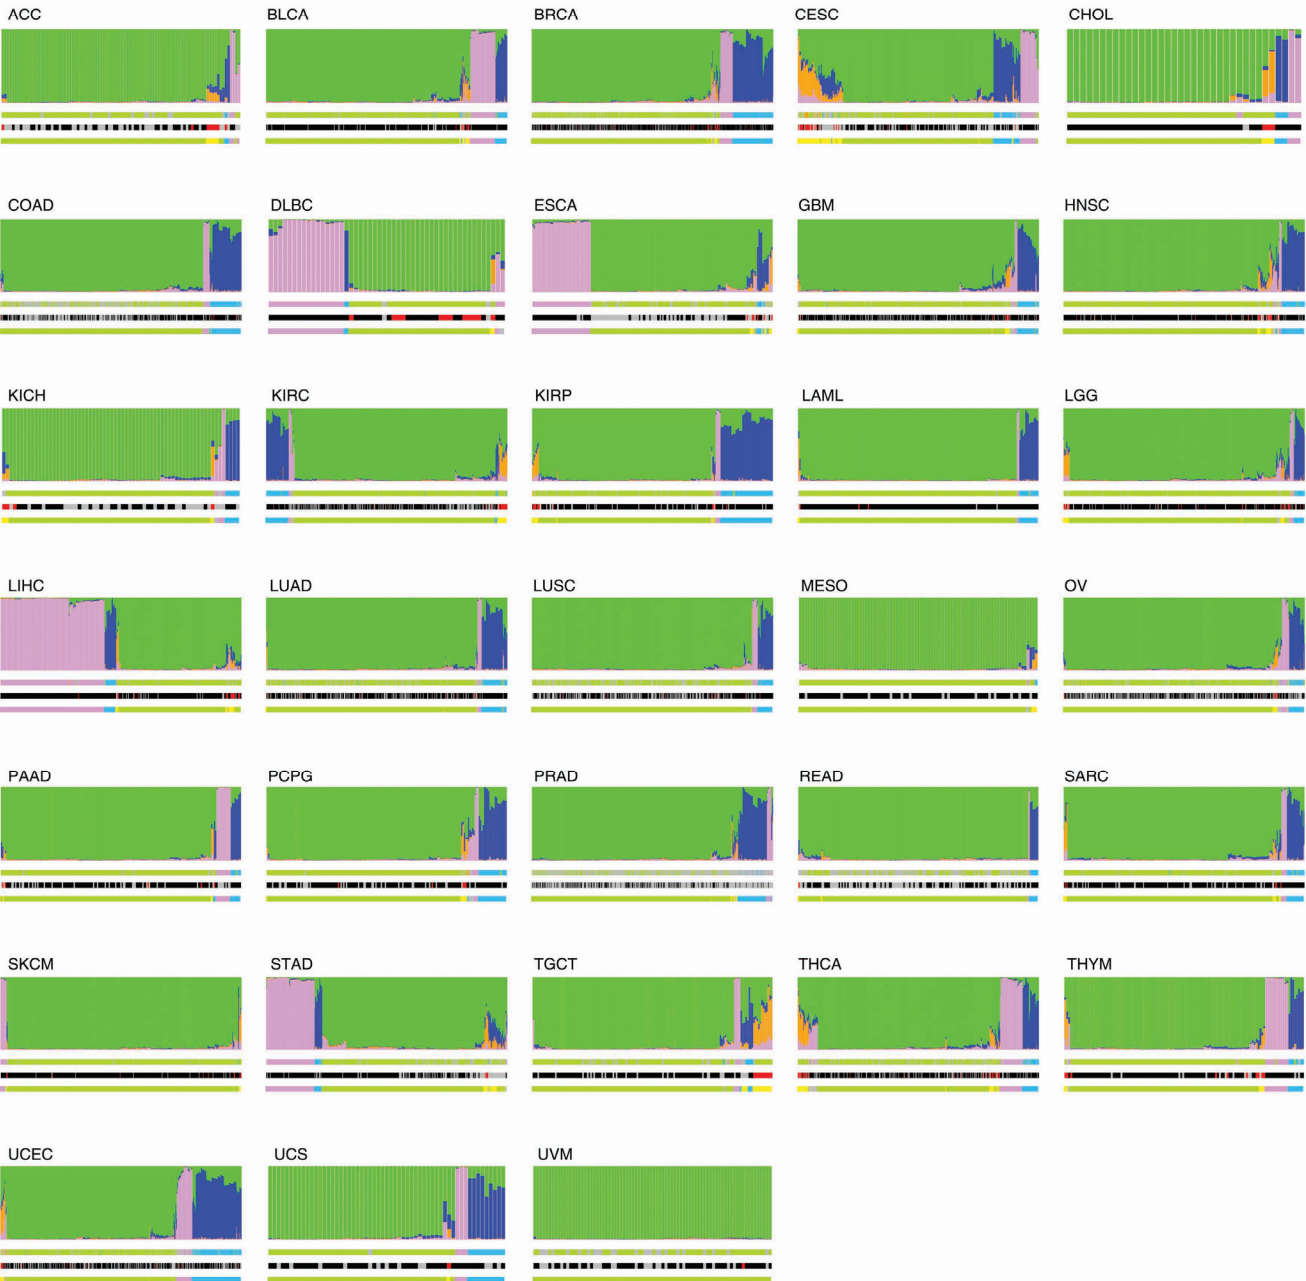

**Figure S2, related to Figure 1. Genetic ancestry of TCGA specimens inferred by STRUCTURE.**

Each color represents one of the ancestral reference groups. Each patient is represented by a column partitioned into different colors corresponding to his/her genetic ancestry composition. Patients are ordered following a hierarchical clustering by Ward's methods on distance matrix calculated as cosine dissimilarity of genetic composition. SIRE and genetic ancestry categorization as estimated by EIGENSTRAT for each patient are shown in the same order at the bottom.

**A**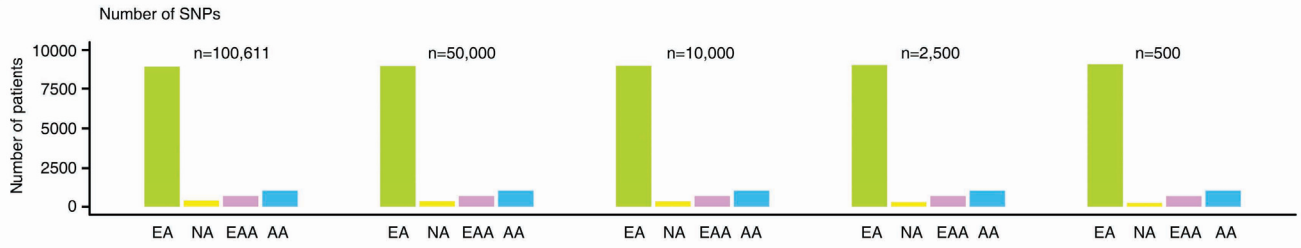**B**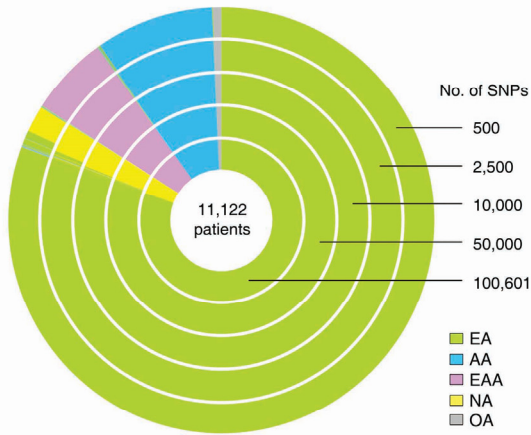**C**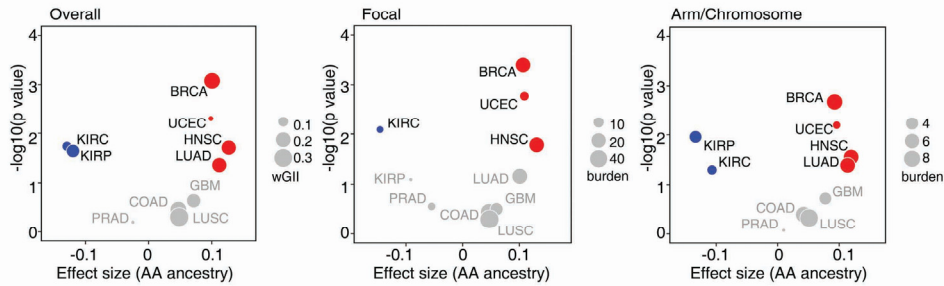**D**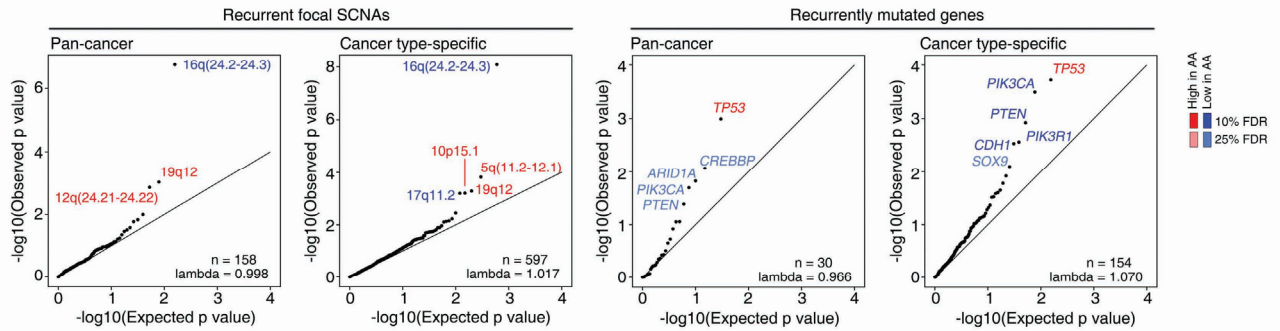

**Figure S3, related to Figures 1, 4 and 5. AA genetic ancestry and association with genomic features.** (A and B) Distribution of genetic ancestry groups of the TCGA patients using different numbers of the SNPs. Bar plots show the results of genetic ancestry prediction based on down-sampled sets of SNPs (A). The number of the SNPs (n) used in each set is labeled in each bar plot. Circle plots show the proportion of genetic ancestry groups (EA, AA, EAA, NA and OA) categorized by EIGENSTRAT (B). Each layer represents the result applying a set of SNPs with a designated size. The innermost layer represents the result using the maximum number of SNPs we obtained (n=100,601). The outermost layer represents the result using a minimal number of SNPs we tested (n=500). (C) AA genetic ancestry and global somatic copy number alterations by regression analysis. Volcano plots of  $-\log_{10}$  (p value) against effect size represent the influence of AA ancestry on SCNA scores across 10 cancer types. Each circle corresponds to a cancer type with size proportional to median burden of SCNA: weighted genomic instability index at overall level, weighted sum of SCNA events at focal level or arm/chromosomal level. Significance (y axis) and effect size (x axis) were calculated by linear regression with clinical factors as covariates. SCNA scores were rank-scaling transformed as a conservative measure to avoid results driven by outliers. Positive effect size corresponded to elevation of SCNA score by AA ancestry and negative values to reduction. The cancer types with elevated or reduced SCNA scores by AA ancestry (FDR < 10%) are shown in red or blue, respectively. Cancer types with non-significant results are shown in grey. (D) QQ plots compares the distribution of the observed p values ( $-\log$  scale) with an expected uniform distribution under the null (sloping line). In each plot, a dot represents the association of AA genetic ancestry with a recurrent focal SCNA or a recurrently mutated gene (at pan-cancer and cancer type-specific levels, respectively). Dots for recurrent focal SCNAs and recurrently mutated genes with significantly different rates of alteration in AA patients (compared with EA patients) are colored in red or blue (red, higher rates in AAs; blue, lower rates in AAs).

**Table S1, related to Figure 1. Summary of TCGA patients by self-identified race/ethnicity (SIRE) and genetic ancestry.**

| Primary site  | Cancer type                                                      | Abbreviations | Number | Self-identified race |       |       |        |          |             | Self-identified ethnicity |              |             | Genetic ancestry*** |       |     |     |        |
|---------------|------------------------------------------------------------------|---------------|--------|----------------------|-------|-------|--------|----------|-------------|---------------------------|--------------|-------------|---------------------|-------|-----|-----|--------|
|               |                                                                  |               |        | White                | Black | Asian | AI/AN* | NH/OPI** | Unavailable | Hispanic                  | non-Hispanic | Unavailable | EA                  | AA    | EAA | NA  | Others |
| Bone Marrow   | Acute Myeloid Leukemia                                           | LAML          | 200    | 181                  | 15    | 2     | 0      | 0        | 2           | 3                         | 194          | 3           | 180                 | 16    | 2   | 2   | 0      |
| Adrenal Gland | Adrenocortical carcinoma                                         | ACC           | 92     | 78                   | 1     | 2     | 0      | 0        | 11          | 8                         | 40           | 44          | 82                  | 2     | 3   | 5   | 0      |
| Bladder       | Bladder Urothelial Carcinoma                                     | BLCA          | 412    | 327                  | 23    | 44    | 0      | 0        | 18          | 9                         | 371          | 32          | 331                 | 22    | 43  | 14  | 2      |
| Brain         | Brain Lower Grade Glioma                                         | LGG           | 515    | 474                  | 21    | 8     | 1      | 0        | 11          | 32                        | 448          | 35          | 452                 | 24    | 9   | 25  | 5      |
| Breast        | Breast invasive carcinoma                                        | BRCA          | 1,098  | 757                  | 183   | 61    | 1      | 0        | 96          | 39                        | 884          | 175         | 825                 | 183   | 57  | 25  | 8      |
| Cervix        | Cervical squamous cell carcinoma and endocervical adenocarcinoma | CESC          | 304    | 209                  | 30    | 19    | 8      | 2        | 36          | 24                        | 168          | 112         | 193                 | 33    | 21  | 57  | 0      |
| Bile Duct     | Cholangiocarcinoma                                               | CHOL          | 36     | 31                   | 2     | 3     | 0      | 0        | 0           | 2                         | 33           | 1           | 30                  | 2     | 2   | 2   | 0      |
| Colon         | Colon adenocarcinoma                                             | COAD          | 459    | 214                  | 58    | 11    | 1      | 0        | 175         | 4                         | 270          | 185         | 386                 | 59    | 12  | 2   | 0      |
| Esophagus     | Esophageal carcinoma                                             | ESCA          | 185    | 114                  | 5     | 46    | 0      | 0        | 20          | 6                         | 88           | 91          | 125                 | 6     | 45  | 8   | 1      |
| Brain         | Glioblastoma multiforme                                          | GBM           | 599    | 504                  | 51    | 13    | 0      | 0        | 31          | 13                        | 489          | 97          | 512                 | 51    | 7   | 19  | 10     |
| Head and Neck | Head and Neck squamous cell carcinoma                            | HNSC          | 526    | 450                  | 48    | 11    | 2      | 0        | 15          | 26                        | 463          | 37          | 437                 | 54    | 6   | 23  | 6      |
| Kidney        | Kidney Chromophobe                                               | KICH          | 66     | 58                   | 4     | 2     | 0      | 0        | 2           | 4                         | 32           | 30          | 56                  | 4     | 2   | 3   | 1      |
| Kidney        | Kidney renal clear cell carcinoma                                | KIRC          | 534    | 463                  | 56    | 8     | 0      | 0        | 7           | 26                        | 356          | 152         | 449                 | 55    | 9   | 20  | 1      |
| Kidney        | Kidney renal papillary cell carcinoma                            | KIRP          | 290    | 206                  | 61    | 6     | 2      | 0        | 15          | 12                        | 242          | 36          | 208                 | 63    | 6   | 12  | 1      |
| Liver         | Liver hepatocellular carcinoma                                   | LIHC          | 377    | 187                  | 17    | 161   | 2      | 0        | 10          | 18                        | 340          | 19          | 178                 | 18    | 163 | 17  | 1      |
| Lung          | Lung adenocarcinoma                                              | LUAD          | 518    | 391                  | 52    | 8     | 1      | 0        | 66          | 7                         | 386          | 125         | 451                 | 53    | 9   | 5   | 0      |
| Lung          | Lung squamous cell carcinoma                                     | LUSC          | 504    | 351                  | 31    | 9     | 0      | 0        | 113         | 8                         | 319          | 177         | 459                 | 32    | 11  | 1   | 1      |
| Lymph Nodes   | Lymphoid Neoplasm Diffuse Large B-cell Lymphoma                  | DLBC          | 50     | 29                   | 1     | 18    | 0      | 0        | 2           | 12                        | 36           | 2           | 30                  | 1     | 17  | 1   | 1      |
| Pleura        | Mesothelioma                                                     | MESO          | 87     | 85                   | 1     | 1     | 0      | 0        | 0           | 0                         | 73           | 14          | 84                  | 0     | 0   | 2   | 1      |
| Ovary         | Ovarian serous cystadenocarcinoma                                | OV            | 592    | 485                  | 34    | 20    | 3      | 1        | 49          | 10                        | 331          | 251         | 515                 | 38    | 17  | 13  | 9      |
| Pancreas      | Pancreatic adenocarcinoma                                        | PAAD          | 185    | 162                  | 7     | 11    | 0      | 0        | 5           | 5                         | 137          | 43          | 161                 | 10    | 11  | 3   | 0      |
| Adrenal Gland | Pheochromocytoma and Paraganglioma                               | PCPG          | 179    | 148                  | 20    | 6     | 1      | 0        | 4           | 5                         | 138          | 36          | 144                 | 22    | 3   | 6   | 4      |
| Prostate      | Prostate adenocarcinoma                                          | PRAD          | 498    | 147                  | 7     | 2     | 0      | 0        | 342         | 0                         | 152          | 346         | 414                 | 61    | 11  | 10  | 2      |
| Rectal        | Rectum adenocarcinoma                                            | READ          | 167    | 81                   | 6     | 1     | 0      | 0        | 79          | 1                         | 82           | 84          | 158                 | 6     | 1   | 2   | 0      |
| Soft Tissue   | Sarcoma                                                          | SARC          | 261    | 228                  | 18    | 6     | 0      | 0        | 9           | 5                         | 223          | 33          | 226                 | 19    | 6   | 10  | 0      |
| Skin          | Skin Cutaneous Melanoma                                          | SKCM          | 470    | 447                  | 1     | 12    | 0      | 0        | 10          | 11                        | 446          | 13          | 449                 | 1     | 12  | 8   | 0      |
| Stomach       | Stomach adenocarcinoma                                           | STAD          | 443    | 278                  | 13    | 89    | 0      | 1        | 62          | 5                         | 318          | 120         | 310                 | 15    | 89  | 26  | 3      |
| Testis        | Testicular Germ Cell Tumors                                      | TGCT          | 150    | 119                  | 6     | 4     | 0      | 0        | 21          | 12                        | 111          | 27          | 125                 | 4     | 4   | 16  | 1      |
| Thymus        | Thymoma                                                          | THYM          | 124    | 103                  | 6     | 13    | 0      | 0        | 2           | 10                        | 100          | 14          | 98                  | 8     | 12  | 5   | 1      |
| Thyroid       | Thyroid carcinoma                                                | THCA          | 505    | 333                  | 27    | 52    | 1      | 0        | 92          | 38                        | 364          | 103         | 366                 | 34    | 47  | 41  | 17     |
| Uterine       | Uterine Carcinosarcoma                                           | UCS           | 57     | 44                   | 9     | 3     | 0      | 0        | 1           | 1                         | 43           | 13          | 44                  | 9     | 3   | 1   | 0      |
| Uterine       | Uterine Corpus Endometrial Carcinoma                             | UCEC          | 559    | 374                  | 108   | 20    | 4      | 9        | 44          | 15                        | 376          | 168         | 393                 | 114   | 37  | 13  | 2      |
| Eye           | Uveal Melanoma                                                   | UVM           | 80     | 55                   | 0     | 0     | 0      | 0        | 25          | 1                         | 52           | 27          | 80                  | 0     | 0   | 0   | 0      |
| <b>Total</b>  |                                                                  |               | 11,122 | 8,113                | 922   | 672   | 27     | 13       | 1,375       | 372                       | 8,105        | 2,645       | 8,951               | 1,019 | 677 | 397 | 78     |

\*AI/AN: American Indian and Alaska Native

\*\*NH/OPI: Native Hawaiian and Other Pacific Islander

\*\*\*EA: European American; AA: African American; EAA: East Asian American; NA: Native American; OA: Others



**Table S2, related to Figure 1. Summary of the reference populations from the HapMap and HGDP projects.**

| <b>Reference Population</b>                                                                | <b>Abbreviations</b> | <b>Database</b> | <b>Number of unrelated individuals</b> |
|--------------------------------------------------------------------------------------------|----------------------|-----------------|----------------------------------------|
| <b>African ancestry in Southwest USA</b>                                                   | ASW                  | HapMap          | 52                                     |
| <b>Utah residents with Northern and Western European ancestry from the CEPH collection</b> | CEU                  | HapMap          | 112                                    |
| <b>Han Chinese in Beijing, China</b>                                                       | CHB                  | HapMap          | 137                                    |
| <b>Chinese in Metropolitan Denver, Colorado</b>                                            | CHD                  | HapMap          | 106                                    |
| <b>Gujarati Indians in Houston, Texas</b>                                                  | GIH                  | HapMap          | 97                                     |
| <b>Japanese in Tokyo, Japan</b>                                                            | JPT                  | HapMap          | 113                                    |
| <b>Luhya in Webuye, Kenya</b>                                                              | LWK                  | HapMap          | 99                                     |
| <b>Mexican ancestry in Los Angeles, California</b>                                         | MXL                  | HapMap          | 54                                     |
| <b>Maasai in Kinyawa, Kenya</b>                                                            | MKK                  | HapMap          | 105                                    |
| <b>Toscani in Italia</b>                                                                   | TSI                  | HapMap          | 102                                    |
| <b>Yoruba in Ibadan, Nigeria</b>                                                           | YRI                  | HapMap          | 140                                    |
| <b>Colombians</b>                                                                          | HGDP                 | HGDP            | 7                                      |
| <b>Karitiana</b>                                                                           | HGDP                 | HGDP            | 14                                     |
| <b>Maya</b>                                                                                | HGDP                 | HGDP            | 21                                     |
| <b>Pima</b>                                                                                | HGDP                 | HGDP            | 14                                     |
| <b>Surui</b>                                                                               | HGDP                 | HGDP            | 8                                      |

**Table S3, related to Figure 3. Summary of genetic ancestry of TCGA patients based on primary sites and cancer types.**

| Cancer Type                                                      | Abbreviations | Primary Site  | Racial and Ethnic Groups |           |                 |               |                 |                        |                 | Genetic ancestry |     |     |     |        |    |
|------------------------------------------------------------------|---------------|---------------|--------------------------|-----------|-----------------|---------------|-----------------|------------------------|-----------------|------------------|-----|-----|-----|--------|----|
|                                                                  |               |               | Black                    | Asian     | American Indian | Alaska Native | Native Hawaiian | Other Pacific Islander | Hispanic/Latino | EA               | AA  | EAA | NA  | Others |    |
| Acute Myeloid Leukemia                                           | LAML          | Bone Marrow   |                          |           |                 |               |                 |                        |                 |                  | 180 | 16  | 2   | 2      | 0  |
| Adrenocortical carcinoma                                         | ACC           | Adrenal Gland |                          |           |                 |               |                 |                        |                 |                  | 82  | 2   | 3   | 5      | 0  |
| Bladder Urothelial Carcinoma                                     | BLCA          | Bladder       |                          |           |                 |               |                 |                        |                 |                  | 331 | 22  | 43  | 14     | 2  |
| Brain Lower Grade Glioma                                         | LGG           | Brain         |                          |           |                 |               |                 |                        |                 |                  | 452 | 24  | 9   | 25     | 5  |
| Breast invasive carcinoma                                        | BRCA          | Breast        | H.M.                     |           |                 |               |                 |                        |                 |                  | 825 | 183 | 57  | 25     | 8  |
| Cervical squamous cell carcinoma and endocervical adenocarcinoma | CESC          | Cervix        | H.M.                     |           |                 |               |                 |                        | H.I.            |                  | 193 | 33  | 21  | 57     | 0  |
| Cholangiocarcinoma                                               | CHOL          | Bile Duct     |                          | H.I./H.M. |                 |               |                 |                        |                 |                  | 30  | 2   | 2   | 2      | 0  |
| Colon adenocarcinoma                                             | COAD          | Colon         | H.I./H.M.                |           |                 |               |                 |                        |                 |                  | 386 | 59  | 12  | 2      | 0  |
| Esophageal carcinoma                                             | ESCA          | Esophagus     |                          |           |                 |               |                 |                        |                 |                  | 125 | 6   | 45  | 8      | 1  |
| Glioblastoma multiforme                                          | GBM           | Brain         |                          |           |                 |               |                 |                        |                 |                  | 512 | 51  | 7   | 19     | 10 |
| Head and Neck squamous cell carcinoma                            | HNSC          | Head and Neck | H.M.                     |           |                 |               |                 |                        |                 |                  | 437 | 54  | 6   | 23     | 6  |
| Kidney Chromophobe                                               | KICH          |               |                          |           |                 |               |                 |                        |                 |                  | 56  | 4   | 2   | 3      | 1  |
| Kidney renal clear cell carcinoma                                | KIRC          |               |                          |           |                 |               |                 |                        |                 |                  | 449 | 55  | 9   | 20     | 1  |
| Kidney renal papillary cell carcinoma                            | KIRP          | Kidney        | H.I.                     |           | H.M.            |               | H.M.            |                        |                 |                  | 208 | 63  | 6   | 12     | 1  |
| Liver hepatocellular carcinoma                                   | LIHC          | Liver         |                          | H.I./H.M. |                 |               |                 |                        | H.I.            | H.I.             | 178 | 18  | 163 | 17     | 1  |
| Lung adenocarcinoma                                              | LUAD          |               |                          |           |                 |               |                 |                        |                 |                  | 451 | 53  | 9   | 5      | 0  |
| Lung squamous cell carcinoma                                     | LUSC          | Lung          | H.I./H.M.                |           |                 |               |                 |                        |                 |                  | 459 | 32  | 11  | 1      | 1  |
| Lymphoid Neoplasm Diffuse Large B-cell Lymphoma                  | DLBC          | Lymph Nodes   |                          |           |                 |               |                 |                        |                 |                  | 30  | 1   | 17  | 1      | 1  |
| Mesothelioma                                                     | MESO          | Pleura        |                          |           |                 |               |                 |                        |                 |                  | 84  | 0   | 0   | 2      | 1  |
| Ovarian serous cystadenocarcinoma                                | OV            | Ovary         |                          |           |                 |               |                 |                        |                 |                  | 515 | 38  | 17  | 13     | 9  |
| Pancreatic adenocarcinoma                                        | PAAD          | Pancreas      | H.I./H.M.                |           |                 |               |                 |                        |                 |                  | 161 | 10  | 11  | 3      | 0  |
| Pheochromocytoma and Paraganglioma                               | PCPG          | Adrenal Gland |                          |           |                 |               |                 |                        |                 |                  | 144 | 22  | 3   | 6      | 4  |
| Prostate adenocarcinoma                                          | PRAD          | Prostate      | H.I./H.M.                |           |                 |               |                 |                        |                 |                  | 414 | 61  | 11  | 10     | 2  |
| Rectum adenocarcinoma                                            | READ          | Rectal        | H.I./H.M.                |           |                 |               |                 |                        |                 |                  | 158 | 6   | 1   | 2      | 0  |
| Sarcoma                                                          | SARC          | Soft Tissue   | H.I./H.M.                |           |                 |               |                 |                        |                 |                  | 226 | 19  | 6   | 10     | 0  |
| Skin Cutaneous Melanoma                                          | SKCM          | Skin          |                          |           |                 |               |                 |                        |                 |                  | 449 | 1   | 12  | 8      | 0  |
| Stomach adenocarcinoma                                           | STAD          | Stomach       | H.M.                     | H.I.      |                 |               |                 |                        |                 |                  | 310 | 15  | 89  | 26     | 3  |
| Testicular Germ Cell Tumors                                      | TGCT          | Testis        |                          |           |                 |               |                 |                        | H.M.            |                  | 125 | 4   | 4   | 16     | 1  |
| Thymoma                                                          | THYM          | Thymus        |                          |           |                 |               |                 |                        |                 |                  | 98  | 8   | 12  | 5      | 1  |
| Thyroid carcinoma                                                | THCA          | Thyroid       |                          | H.M.      |                 |               |                 |                        |                 |                  | 366 | 34  | 47  | 41     | 17 |
| Uterine Carcinosarcoma                                           | UCS           |               |                          |           |                 |               |                 |                        |                 |                  | 44  | 9   | 3   | 1      | 0  |
| Uterine Corpus Endometrial Carcinoma                             | UCEC          | Uterine       | H.M.                     |           |                 |               |                 |                        |                 |                  | 393 | 114 | 37  | 13     | 2  |
| Uveal Melanoma                                                   | UVM           | Eye           |                          |           |                 |               |                 |                        |                 |                  | 80  | 0   | 0   | 0      | 0  |

**H.I. = Higher Incidence**

**H.M. = Higher Mortality**

**Table S4, related to Figure 3. Summary of cancer cell lines by primary site and genetic ancestry.**

| Primary site                       | Sample number | Genetic ancestry |    |     |    |        |
|------------------------------------|---------------|------------------|----|-----|----|--------|
|                                    |               | EA               | AA | EAA | NA | Others |
| Adrenal gland                      | 1             | 1                | 0  | 0   | 0  | 0      |
| Autonomic ganglia                  | 38            | 23               | 2  | 11  | 2  | 0      |
| Biliary tract                      | 6             | 1                | 0  | 5   | 0  | 0      |
| Bone                               | 55            | 42               | 2  | 8   | 3  | 0      |
| Breast                             | 65            | 46               | 11 | 4   | 2  | 2      |
| Central nervous system             | 64            | 46               | 1  | 17  | 0  | 0      |
| Cervix                             | 11            | 8                | 1  | 2   | 0  | 0      |
| Endometrium                        | 26            | 9                | 0  | 17  | 0  | 0      |
| Haematopoietic and lymphoid tissue | 226           | 138              | 17 | 70  | 1  | 0      |
| Kidney                             | 41            | 27               | 2  | 12  | 0  | 0      |
| Large intestine                    | 53            | 43               | 2  | 6   | 1  | 1      |
| Liver                              | 19            | 1                | 3  | 13  | 2  | 0      |
| Lung                               | 222           | 166              | 22 | 31  | 3  | 0      |
| Oesophagus                         | 36            | 8                | 2  | 26  | 0  | 0      |
| Ovary                              | 60            | 36               | 3  | 20  | 1  | 0      |
| Pancreas                           | 44            | 27               | 1  | 16  | 0  | 0      |
| Placenta                           | 2             | 2                | 0  | 0   | 0  | 0      |
| Pleura                             | 25            | 21               | 3  | 1   | 0  | 0      |
| Prostate                           | 10            | 9                | 1  | 0   | 0  | 0      |
| Salivary gland                     | 3             | 1                | 0  | 2   | 0  | 0      |
| Skin                               | 86            | 79               | 0  | 7   | 0  | 0      |
| Small intestine                    | 1             | 0                | 1  | 0   | 0  | 0      |
| Soft tissue                        | 24            | 17               | 2  | 3   | 2  | 0      |
| Stomach                            | 37            | 2                | 2  | 31  | 2  | 0      |
| Testis                             | 3             | 1                | 0  | 2   | 0  | 0      |
| Thyroid                            | 15            | 10               | 0  | 5   | 0  | 0      |
| Upper aerodigestive tract          | 49            | 33               | 1  | 14  | 0  | 1      |
| Urinary tract                      | 26            | 18               | 2  | 6   | 0  | 0      |
| Vulva                              | 3             | 3                | 0  | 0   | 0  | 0      |

**Table S5, related to Figure 5. List of recurrent focal SCNAs with significantly different alteration frequencies between AA and EA patients by pan-cancer meta-analysis.**

| <b>Genomic Location</b>   | <b>Cytoband</b>   | <b>SCNA</b> | <b>Z score</b> | <b>p value</b> | <b>FDR</b> |
|---------------------------|-------------------|-------------|----------------|----------------|------------|
| chr12:114801336-117274075 | 12q24.21-12q24.22 | Loss        | 3.200          | 1.376E-03      | 7.246E-02  |
| chr16:87332621-90354753   | 16q24.2-16q24.3   | Loss        | -5.220         | 1.785E-07      | 2.820E-05  |
| chr19:30211823-30453022   | 19q12             | Gain        | 3.309          | 9.373E-04      | 7.246E-02  |

**Table S6, related to Figure 5. List of genes potentially contributing to disparity identified by pan-cancer meta-analysis.**

| Gene Symbol         | Accession       | Gene Type          | SCNA                      | SCNA Type     | Expression (Upper Quartile) | Differential Expression |             |             | Expression Correlation With CN |             |             |
|---------------------|-----------------|--------------------|---------------------------|---------------|-----------------------------|-------------------------|-------------|-------------|--------------------------------|-------------|-------------|
|                     |                 |                    |                           |               |                             | Z score                 | p value     | FDR         | Correlation Coefficient        | p value     | FDR         |
| <i>CCNE1</i>        | ENSG00000105173 | protein_coding     | chr19: 30211823- 30453022 | Amplification | 7.704676357                 | 5.021993784             | 5.11378E-07 | 4.18843E-06 | 0.494313599                    | 1.77605E-19 | 6.70951E-19 |
| <i>UR11</i>         | ENSG00000105176 | protein_coding     | chr19: 30211823- 30453022 | Amplification | 18.86857091                 | 2.721394124             | 0.006500721 | 0.016442999 | 0.734760829                    | 1.2001E-108 | 1.3601E-107 |
| <i>MED13L</i>       | ENSG00000123066 | protein_coding     | chr12:114801336-117274075 | Deletion      | 12.35400924                 | -6.73478932             | 1.64168E-11 | 3.00057E-10 | 0.374490726                    | 1.051E-153  | 1.6243E-152 |
| <i>C12orf49</i>     | ENSG00000111412 | protein_coding     | chr12:114801336-117274075 | Deletion      | 10.08157592                 | -3.282528399            | 0.001028806 | 0.003402974 | 0.316011068                    | 8.90546E-63 | 7.96804E-62 |
| <i>RP11-178L8.7</i> | ENSG00000270006 | antisense          | chr16: 87332621- 90354753 | Deletion      | 1.188055195                 | 6.960455116             | 3.39175E-12 | 1.45845E-10 | 0.352835137                    | 1.87016E-61 | 1.58964E-60 |
| <i>FBXO31</i>       | ENSG00000103264 | protein_coding     | chr16: 87332621- 90354753 | Deletion      | 5.451229183                 | 2.128747435             | 0.033275162 | 0.072447188 | 0.515907356                    | 2.21191E-89 | 2.35015E-88 |
| <i>KLHDC4</i>       | ENSG00000104731 | protein_coding     | chr16: 87332621- 90354753 | Deletion      | 3.31894905                  | 6.577066838             | 4.79819E-11 | 7.50263E-10 | 0.509914469                    | 1.39267E-36 | 8.45548E-36 |
| <i>BANP</i>         | ENSG00000172530 | protein_coding     | chr16: 87332621- 90354753 | Deletion      | 2.017602873                 | 4.880555477             | 1.05787E-06 | 7.91106E-06 | 0.276979827                    | 3.18943E-05 | 6.77754E-05 |
| <i>ZFPM1</i>        | ENSG00000179588 | protein_coding     | chr16: 87332621- 90354753 | Deletion      | 1.426646968                 | 4.168047718             | 3.0722E-05  | 0.000120095 | 0.241763989                    | 0.006869537 | 0.010624476 |
| <i>ZC3H18</i>       | ENSG00000158545 | protein_coding     | chr16: 87332621- 90354753 | Deletion      | 6.55897406                  | 4.020107264             | 5.81716E-05 | 0.000217511 | 0.590765487                    | 3.92514E-35 | 2.22424E-34 |
| <i>CYBA</i>         | ENSG00000051523 | protein_coding     | chr16: 87332621- 90354753 | Deletion      | 55.33277649                 | 4.675498216             | 2.93241E-06 | 1.68125E-05 | 0.306103285                    | 9.77277E-27 | 4.61492E-26 |
| <i>MVD</i>          | ENSG00000167508 | protein_coding     | chr16: 87332621- 90354753 | Deletion      | 8.332245193                 | 6.725948805             | 1.74452E-11 | 3.00057E-10 | 0.48220506                     | 4.91719E-33 | 2.61226E-32 |
| <i>RNF166</i>       | ENSG00000158717 | protein_coding     | chr16: 87332621- 90354753 | Deletion      | 5.224803804                 | 6.792837                | 1.0995E-11  | 2.47888E-10 | 0.266463998                    | 0.000259989 | 0.000491091 |
| <i>CTU2</i>         | ENSG00000174177 | protein_coding     | chr16: 87332621- 90354753 | Deletion      | 5.008474608                 | 5.504419297             | 3.70387E-08 | 4.29243E-07 | 0.499546825                    | 1.12829E-34 | 6.1874E-34  |
| <i>CDT1</i>         | ENSG00000167513 | protein_coding     | chr16: 87332621- 90354753 | Deletion      | 6.578018314                 | 4.753322083             | 2.00101E-06 | 1.32375E-05 | 0.208472881                    | 0.006937158 | 0.010624476 |
| <i>APRT</i>         | ENSG00000198931 | protein_coding     | chr16: 87332621- 90354753 | Deletion      | 67.29373777                 | 2.540567294             | 0.011067279 | 0.026810874 | 0.503246149                    | 0           | 0           |
| <i>GALNS</i>        | ENSG00000141012 | protein_coding     | chr16: 87332621- 90354753 | Deletion      | 4.644139944                 | 4.824766249             | 1.40168E-06 | 1.00453E-05 | 0.581512505                    | 3.68996E-21 | 1.45882E-20 |
| <i>ACSF3</i>        | ENSG00000176715 | protein_coding     | chr16: 87332621- 90354753 | Deletion      | 2.807687084                 | 3.254320066             | 0.001136641 | 0.003620413 | 0.546780018                    | 1.17029E-26 | 5.377E-26   |
| <i>SPG7</i>         | ENSG00000197912 | protein_coding     | chr16: 87332621- 90354753 | Deletion      | 7.472638553                 | 6.785985275             | 1.15297E-11 | 2.47888E-10 | 0.550033775                    | 2.60473E-22 | 1.08001E-21 |
| <i>RPL13</i>        | ENSG00000167526 | protein_coding     | chr16: 87332621- 90354753 | Deletion      | 173.5009749                 | 4.720760297             | 2.34965E-06 | 1.49609E-05 | 0.323475147                    | 2.21184E-39 | 1.56672E-38 |
| <i>CHMP1A</i>       | ENSG00000131165 | protein_coding     | chr16: 87332621- 90354753 | Deletion      | 43.63303189                 | 5.887622567             | 3.91791E-09 | 5.61567E-08 | 0.613930753                    | 5.0302E-126 | 6.1081E-125 |
| <i>SPATA33</i>      | ENSG00000167523 | protein_coding     | chr16: 87332621- 90354753 | Deletion      | 2.020762246                 | 4.706304775             | 2.52247E-06 | 1.49609E-05 | 0.459968073                    | 2.47117E-24 | 1.07718E-23 |
| <i>CDK10</i>        | ENSG00000185324 | protein_coding     | chr16: 87332621- 90354753 | Deletion      | 9.85344778                  | 7.327055761             | 2.35264E-13 | 1.34885E-11 | 0.375486545                    | 3.07529E-18 | 1.08916E-17 |
| <i>SPATA2L</i>      | ENSG00000158792 | protein_coding     | chr16: 87332621- 90354753 | Deletion      | 7.248753798                 | 5.492382523             | 3.96547E-08 | 4.29243E-07 | 0.406840364                    | 8.02062E-41 | 5.92828E-40 |
| <i>VPS9D1</i>       | ENSG00000075399 | protein_coding     | chr16: 87332621- 90354753 | Deletion      | 7.85143401                  | 6.801386314             | 1.03617E-11 | 2.47888E-10 | 0.497279634                    | 2.00461E-29 | 1.0023E-28  |
| <i>VPS9D1-AS1</i>   | ENSG00000261373 | antisense          | chr16: 87332621- 90354753 | Deletion      | 3.691291536                 | 2.347809593             | 0.018884172 | 0.044494214 | 0.148718772                    | 3.9492E-11  | 1.19886E-10 |
| <i>ZNF276</i>       | ENSG00000158805 | protein_coding     | chr16: 87332621- 90354753 | Deletion      | 3.041370684                 | 6.786878195             | 1.14586E-11 | 2.47888E-10 | 0.358089867                    | 1.65126E-28 | 8.02039E-28 |
| <i>SPIRE2</i>       | ENSG00000204991 | protein_coding     | chr16: 87332621- 90354753 | Deletion      | 2.565449299                 | 4.712757916             | 2.44386E-06 | 1.49609E-05 | 0.260311128                    | 1.31954E-59 | 1.0682E-58  |
| <i>TCF25</i>        | ENSG00000141002 | protein_coding     | chr16: 87332621- 90354753 | Deletion      | 18.37152486                 | 5.243169137             | 1.57842E-07 | 1.50827E-06 | 0.570198258                    | 3.4199E-233 | 8.3054E-232 |
| <i>MC1R</i>         | ENSG00000258839 | protein_coding     | chr16: 87332621- 90354753 | Deletion      | 1.262305911                 | 3.899896344             | 9.62339E-05 | 0.000344838 | 0.292449286                    | 1.0603E-156 | 1.8025E-155 |
| <i>DEF8</i>         | ENSG00000140995 | protein_coding     | chr16: 87332621- 90354753 | Deletion      | 8.194492002                 | 4.476476639             | 7.5885E-06  | 3.73597E-05 | 0.56813541                     | 1.26543E-87 | 1.26543E-86 |
| <i>AFG3L1P</i>      | ENSG00000223959 | unitary_pseudogene | chr16: 87332621- 90354753 | Deletion      | 1.677837022                 | 5.340435832             | 9.27234E-08 | 9.38143E-07 | 0.322808651                    | 4.39212E-11 | 1.30993E-10 |
| <i>DBNDD1</i>       | ENSG00000003249 | protein_coding     | chr16: 87332621- 90354753 | Deletion      | 12.7264118                  | 2.801436825             | 0.00508756  | 0.013672818 | 0.426457025                    | 1.57259E-10 | 4.5312E-10  |
| <i>GAS8</i>         | ENSG00000141013 | protein_coding     | chr16: 87332621- 90354753 | Deletion      | 6.143787541                 | 3.037299671             | 0.00238708  | 0.006730783 | 0.481141005                    | 1.1066E-18  | 4.0026E-18  |

**Table S7, related to Figure 5. List of recurrent focal SCNAs with significantly different alteration frequencies between AA and EA patients by cancer type-specific analysis.**

| Cancer Type | GISTIC Peak             | Cytoband        | SCNA Type     | GISTIC Q value | Alteration Proportion (Copy Number Change>0.25) | z value    | p value    | FDR        |
|-------------|-------------------------|-----------------|---------------|----------------|-------------------------------------------------|------------|------------|------------|
| BRCA        | chr5:58155654-59787985  | 5q11.2-5q12.1   | Deletion      | 1.1588E-12     | 0.205154639                                     | 3.78851229 | 0.00015155 | 0.0452383  |
| BRCA        | chr10:5013517-5039563   | 10p15.1         | Amplification | 0.000041502    | 0.213402062                                     | 3.42189295 | 0.00062187 | 0.07552452 |
| BRCA        | chr16:88525832-90354753 | 16q24.2-16q24.3 | Deletion      | 5.7308E-08     | 0.570103093                                     | -5.7640184 | 8.2134E-09 | 4.9034E-06 |
| UCEC        | chr17:29413917-29708443 | 17q11.2         | Deletion      | 2.4684E-08     | 0.182952183                                     | -3.4172663 | 0.00063253 | 0.07552452 |
| BRCA        | chr19:30072177-30511416 | 19q12           | Amplification | 2.8236E-08     | 0.183505155                                     | 3.47174712 | 0.00051708 | 0.07552452 |

**Table S8, related to Figure 5. List of genes potentially contributing to disparity for each cancer type by cancer type-specific analysis.**

| Cancer Type | Gene Symbol         | Accession       | Gene Type          | SCNA                    | SCNA Type     | Expression (Upper Quartile) | Differential Expression |             |             | Expression Correlation With CN |             |             |
|-------------|---------------------|-----------------|--------------------|-------------------------|---------------|-----------------------------|-------------------------|-------------|-------------|--------------------------------|-------------|-------------|
|             |                     |                 |                    |                         |               |                             | Z score                 | p value     | FDR         | Correlation Coefficient        | p value     | FDR         |
| BRCA        | <i>ZC3H18</i>       | ENSG00000158545 | protein_coding     | chr16:88525832-90354753 | Deletion      | 5.82064841                  | 7.429693033             | 1.0885E-13  | 8.76836E-13 | 0.699991088                    | 3.2487E-159 | 1.267E-157  |
| BRCA        | <i>CYBA</i>         | ENSG00000051523 | protein_coding     | chr16:88525832-90354753 | Deletion      | 26.37238309                 | 7.987129513             | 1.38117E-15 | 1.36966E-14 | 0.330587732                    | 7.45911E-29 | 2.42421E-28 |
| BRCA        | <i>MVD</i>          | ENSG00000167508 | protein_coding     | chr16:88525832-90354753 | Deletion      | 6.82803507                  | 9.912385445             | 3.67759E-23 | 1.45878E-21 | 0.563221736                    | 4.40569E-91 | 4.29555E-90 |
| BRCA        | <i>RNF166</i>       | ENSG00000158717 | protein_coding     | chr16:88525832-90354753 | Deletion      | 4.012862075                 | 9.188798807             | 3.97252E-20 | 6.75329E-19 | 0.429461076                    | 1.60097E-49 | 7.20438E-49 |
| BRCA        | <i>CTU2</i>         | ENSG00000174177 | protein_coding     | chr16:88525832-90354753 | Deletion      | 4.192217239                 | 9.960287392             | 2.27404E-23 | 1.35306E-21 | 0.574611418                    | 1.4664E-95  | 1.55971E-94 |
| BRCA        | <i>PIEZO1</i>       | ENSG00000103335 | protein_coding     | chr16:88525832-90354753 | Deletion      | 15.16202238                 | 5.019176703             | 5.18934E-07 | 1.62508E-06 | 0.532687152                    | 6.71022E-80 | 5.23397E-79 |
| BRCA        | <i>RP5-1142A6.9</i> | ENSG00000260121 | antisense          | chr16:88525832-90354753 | Deletion      | 1.271929141                 | 2.627215512             | 0.008608679 | 0.01552171  | 0.294912816                    | 4.92112E-23 | 1.339E-22   |
| BRCA        | <i>CDT1</i>         | ENSG00000167513 | protein_coding     | chr16:88525832-90354753 | Deletion      | 7.1527411                   | 9.108717101             | 8.33618E-20 | 1.24001E-18 | 0.395103291                    | 1.5992E-41  | 6.45196E-41 |
| BRCA        | <i>APRT</i>         | ENSG00000198931 | protein_coding     | chr16:88525832-90354753 | Deletion      | 56.96790937                 | 7.101736663             | 1.23199E-12 | 8.62392E-12 | 0.498919172                    | 8.52079E-69 | 5.53851E-68 |
| BRCA        | <i>GALNS</i>        | ENSG00000141012 | protein_coding     | chr16:88525832-90354753 | Deletion      | 3.754837571                 | 6.596170349             | 4.21914E-11 | 2.18295E-10 | 0.623325366                    | 7.4598E-117 | 1.7456E-115 |
| BRCA        | <i>TRAPPC2L</i>     | ENSG00000167515 | protein_coding     | chr16:88525832-90354753 | Deletion      | 7.919829903                 | 5.340493493             | 9.26939E-08 | 3.3426E-07  | 0.515643128                    | 3.86634E-74 | 2.82726E-73 |
| BRCA        | <i>ACSF3</i>        | ENSG00000176715 | protein_coding     | chr16:88525832-90354753 | Deletion      | 2.341781298                 | 5.677066623             | 1.37024E-08 | 5.59942E-08 | 0.465061061                    | 7.60787E-59 | 4.4506E-58  |
| BRCA        | <i>RP11-46C24.7</i> | ENSG00000259877 | antisense          | chr16:88525832-90354753 | Deletion      | 1.611312005                 | 2.433918896             | 0.014936341 | 0.026528726 | 0.398084088                    | 3.51852E-42 | 1.47024E-41 |
| BRCA        | <i>SPG7</i>         | ENSG00000197912 | protein_coding     | chr16:88525832-90354753 | Deletion      | 5.730002396                 | 9.427134926             | 4.21443E-21 | 1.00303E-19 | 0.544083428                    | 6.12864E-84 | 5.12179E-83 |
| BRCA        | <i>RPL13</i>        | ENSG00000167526 | protein_coding     | chr16:88525832-90354753 | Deletion      | 151.954919                  | 7.752485849             | 9.01109E-15 | 8.24861E-14 | 0.33060672                     | 7.40245E-29 | 2.42421E-28 |
| BRCA        | <i>CHMP1A</i>       | ENSG00000131165 | protein_coding     | chr16:88525832-90354753 | Deletion      | 38.89219858                 | 9.35574438              | 8.30131E-21 | 1.64643E-19 | 0.61569016                     | 2.8746E-113 | 5.6054E-112 |
| BRCA        | <i>SPATA33</i>      | ENSG00000167523 | protein_coding     | chr16:88525832-90354753 | Deletion      | 1.933164554                 | 6.908840571             | 4.88631E-12 | 2.90735E-11 | 0.432916797                    | 2.22426E-50 | 1.08433E-49 |
| BRCA        | <i>CDK10</i>        | ENSG00000185324 | protein_coding     | chr16:88525832-90354753 | Deletion      | 6.359586038                 | 10.24827799             | 1.20471E-24 | 1.4336E-22  | 0.338104681                    | 3.49342E-30 | 1.23857E-29 |
| BRCA        | <i>SPATA2L</i>      | ENSG00000158792 | protein_coding     | chr16:88525832-90354753 | Deletion      | 6.314829763                 | 8.923518819             | 4.51703E-19 | 5.97252E-18 | 0.34507552                     | 1.89293E-31 | 6.92103E-31 |
| BRCA        | <i>VPS9D1</i>       | ENSG00000075399 | protein_coding     | chr16:88525832-90354753 | Deletion      | 5.03332479                  | 9.82329055              | 8.93775E-23 | 2.65898E-21 | 0.480905037                    | 2.30992E-63 | 1.42243E-62 |
| BRCA        | <i>VPS9D1-AS1</i>   | ENSG00000261373 | antisense          | chr16:88525832-90354753 | Deletion      | 4.185458521                 | 4.005374865             | 6.19192E-05 | 0.000150375 | 0.20334725                     | 1.662E-11   | 4.05113E-11 |
| BRCA        | <i>ZNF276</i>       | ENSG00000158805 | protein_coding     | chr16:88525832-90354753 | Deletion      | 2.511320339                 | 8.469160135             | 2.47169E-17 | 2.94131E-16 | 0.432727382                    | 2.47987E-50 | 1.16058E-49 |
| BRCA        | <i>FANCA</i>        | ENSG00000187741 | protein_coding     | chr16:88525832-90354753 | Deletion      | 1.620229105                 | 4.756543888             | 1.96935E-06 | 5.32621E-06 | 0.502404014                    | 6.94147E-70 | 4.77736E-69 |
| BRCA        | <i>SPIRE2</i>       | ENSG00000204991 | protein_coding     | chr16:88525832-90354753 | Deletion      | 1.954862952                 | 7.427672073             | 1.10526E-13 | 8.76836E-13 | 0.299454013                    | 9.88766E-24 | 2.75442E-23 |
| BRCA        | <i>TCF25</i>        | ENSG00000141002 | protein_coding     | chr16:88525832-90354753 | Deletion      | 16.43701672                 | 8.40873748              | 4.14448E-17 | 4.48357E-16 | 0.590283709                    | 5.1273E-102 | 6.6655E-101 |
| BRCA        | <i>TUBB3</i>        | ENSG00000258947 | protein_coding     | chr16:88525832-90354753 | Deletion      | 1.035565309                 | 2.955203436             | 0.003124629 | 0.006302219 | 0.374852885                    | 3.13397E-37 | 1.22225E-36 |
| BRCA        | <i>DEF8</i>         | ENSG00000140995 | protein_coding     | chr16:88525832-90354753 | Deletion      | 6.139670482                 | 7.151703884             | 8.57073E-13 | 6.37448E-12 | 0.614104992                    | 1.5514E-112 | 2.5931E-111 |
| BRCA        | <i>AFG3L1P</i>      | ENSG00000223959 | unitary_pseudogene | chr16:88525832-90354753 | Deletion      | 1.506763831                 | 6.436802598             | 1.22016E-10 | 5.5846E-10  | 0.441502527                    | 1.49285E-52 | 7.59409E-52 |
| BRCA        | <i>DBNDD1</i>       | ENSG00000003249 | protein_coding     | chr16:88525832-90354753 | Deletion      | 12.39147979                 | 5.545301602             | 2.93448E-08 | 1.12646E-07 | 0.45245801                     | 2.037E-55   | 1.1349E-54  |
| BRCA        | <i>GAS8</i>         | ENSG00000141013 | protein_coding     | chr16:88525832-90354753 | Deletion      | 5.051450699                 | 4.087786927             | 4.35508E-05 | 0.00010797  | 0.400327764                    | 1.11421E-42 | 4.82824E-42 |
| BRCA        | <i>POP4</i>         | ENSG00000105171 | protein_coding     | chr19:30072177-30511416 | Amplification | 5.785090204                 | 5.983815875             | 2.1797E-09  | 9.26371E-09 | 0.805300781                    | 4.3237E-246 | 5.0588E-244 |
| BRCA        | <i>PLEKHF1</i>      | ENSG00000166289 | protein_coding     | chr19:30072177-30511416 | Amplification | 4.796813308                 | 6.562266927             | 5.29958E-11 | 2.62771E-10 | 0.448994741                    | 1.68276E-54 | 8.94923E-54 |
| BRCA        | <i>C19orf12</i>     | ENSG00000131943 | protein_coding     | chr19:30072177-30511416 | Amplification | 5.370199636                 | 5.224610951             | 1.74522E-07 | 5.76891E-07 | 0.694559872                    | 8.9758E-156 | 2.6254E-154 |
| BRCA        | <i>CCNE1</i>        | ENSG00000105173 | protein_coding     | chr19:30072177-30511416 | Amplification | 2.993048162                 | 6.932394985             | 4.13775E-12 | 2.59154E-11 | 0.56069577                     | 4.10816E-90 | 3.69734E-89 |
| UCEC        | <i>RP11-848P1.5</i> | ENSG00000264107 | antisense          | chr17:29413917-29708443 | Deletion      | 1.79618157                  | 2.415647668             | 0.015707252 | 0.027487691 | 0.261538601                    | 8.12383E-10 | 1.90098E-09 |

**Table S9, related to Figure 6. Difference in mutational signatures between AA and EA patients.**

| Cancer Type | Mutational signature* | Effect size | Effect size Std. Error | Adjusted regression p value | FDR corrected q values |
|-------------|-----------------------|-------------|------------------------|-----------------------------|------------------------|
| <b>BRCA</b> | Signature.age         | -0.1        | 0.1                    | 4.1E-01                     | 9.3E-01                |
|             | Signature.APOBEC      | 0.0         | 0.1                    | 9.1E-01                     | 9.6E-01                |
|             | Signature.3           | 0.2         | 0.1                    | 2.5E-02                     | 5.0E-01                |
|             | Signature.8           | -0.1        | 0.1                    | 5.5E-01                     | 9.3E-01                |
| <b>COAD</b> | Signature.age         | -0.1        | 0.2                    | 6.3E-01                     | 9.3E-01                |
|             | Signature.6           | 0.1         | 0.2                    | 7.0E-01                     | 9.3E-01                |
| <b>HNSC</b> | Signature.age         | 0.3         | 0.2                    | 7.5E-02                     | 6.1E-01                |
|             | Signature.APOBEC      | -0.2        | 0.2                    | 2.3E-01                     | 9.1E-01                |
|             | Signature.4           | 0.1         | 0.2                    | 6.5E-01                     | 9.3E-01                |
| <b>LUAD</b> | Signature.age         | -0.1        | 0.2                    | 7.4E-01                     | 9.3E-01                |
|             | Signature.APOBEC      | -0.2        | 0.2                    | 2.4E-01                     | 9.1E-01                |
|             | Signature.4           | 0.3         | 0.2                    | 9.2E-02                     | 6.1E-01                |
| <b>LUSC</b> | Signature.age         | 0.1         | 0.2                    | 4.6E-01                     | 9.3E-01                |
|             | Signature.APOBEC      | 0.0         | 0.2                    | 8.3E-01                     | 9.6E-01                |
|             | Signature.4           | -0.2        | 0.2                    | 3.5E-01                     | 9.3E-01                |
| <b>PRAD</b> | Signature.age         | -0.2        | 0.2                    | 2.7E-01                     | 9.1E-01                |
|             | Signature.6           | 0.1         | 0.2                    | 5.0E-01                     | 9.3E-01                |
| <b>UCEC</b> | Signature.age         | 0.0         | 0.1                    | 9.2E-01                     | 9.6E-01                |
|             | Signature.6           | 0.0         | 0.1                    | 7.0E-01                     | 9.3E-01                |
|             | Signature.10          | 0.0         | 0.1                    | 9.7E-01                     | 9.7E-01                |

\*Mutational signatures with dominant (more than 95%) or insufficient (less than 5%) contribution to a given cancer type were excluded for analysis. Mutational signatures were designated by COSMIC (<https://cancer.sanger.ac.uk/cosmic/signatures>).



**Table S11, related to Figure 6. List of recurrently mutated genes with significantly different alteration frequencies between AA and EA patients by cancer type-specific analysis.**

| Cancer Type | Gene Symbol   | Alteration Proportion | Differential Altered |             |             |
|-------------|---------------|-----------------------|----------------------|-------------|-------------|
|             |               |                       | z value              | p value     | FDR         |
| BRCA        | <i>CDH1</i>   | 0.135538954           | -2.973072837         | 0.002948345 | 0.090809019 |
| BRCA        | <i>PIK3CA</i> | 0.332977588           | -3.598450362         | 0.000320119 | 0.024649158 |
| BRCA        | <i>TP53</i>   | 0.300960512           | 3.732272808          | 0.00018976  | 0.024649158 |
| COAD        | <i>SOX9</i>   | 0.136138614           | 2.655147529          | 0.007927373 | 0.203469241 |
| UCEC        | <i>PIK3R1</i> | 0.294238683           | -2.994159226         | 0.002752023 | 0.090809019 |
| UCEC        | <i>PTEN</i>   | 0.565843621           | -3.240369875         | 0.001193747 | 0.061279035 |
